# Supplementary material for: Boosting the capacity of biomass-based supercapacitors using carbon materials of wood derivatives and redox molecules from plants
Source: Royal Society of Chemistry journal article supplement (doi:10.1039/d1ta01542g), 2021-01-01
Supplement: d1ta01542g1.pdf [file d1ta01542g1.pdf]

## Supplementary Information

### Boosting the capacity of biomass-based supercapacitor using carbon materials of wood derivatives and redox molecules from plants

Tiansheng Wang<sup>a, b, c</sup>, Shunyou Hu<sup>b, c</sup>, Dong Wu<sup>b, c</sup>, Weiwei Zhao<sup>b, c</sup>, Wen Yu<sup>b, c</sup>, Mi Wang<sup>b, c</sup>, Jie  
Xu<sup>a, c\*</sup>, Jiaheng Zhang<sup>a, b, c\*</sup>

<sup>a</sup>*School of Materials Science and Engineering, Harbin Institute of Technology, Harbin 150080, PR China*

<sup>b</sup>*Sauvage Laboratory for Smart Materials, Harbin Institute of Technology (Shenzhen), Shenzhen 518055, China*

<sup>c</sup>*School of Materials Science and Engineering, Harbin Institute of Technology (Shenzhen), Shenzhen 518055,*

*China*

**Corresponding author.**

\* Email addresses: xjhit@hit.edu.cn; zhangjiaheng@hit.edu.cn

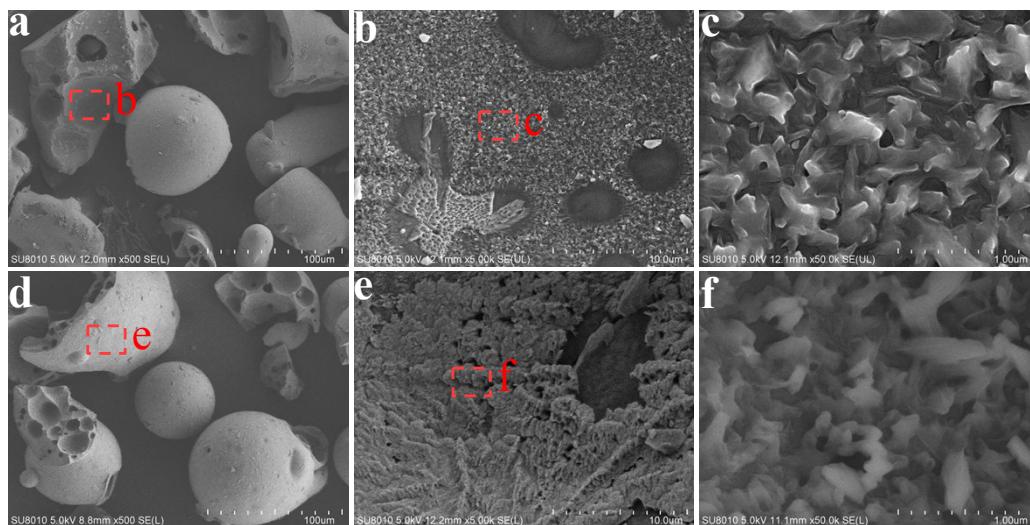

Fig. S1. Typical SEM images of the OLS-1 sample (a–c) and OLS-2 sample (d–f) obtained by LS with molecular weights of 13400 and 4000, respectively: (a, b, d and e) low magnification, (c and f) high magnification.

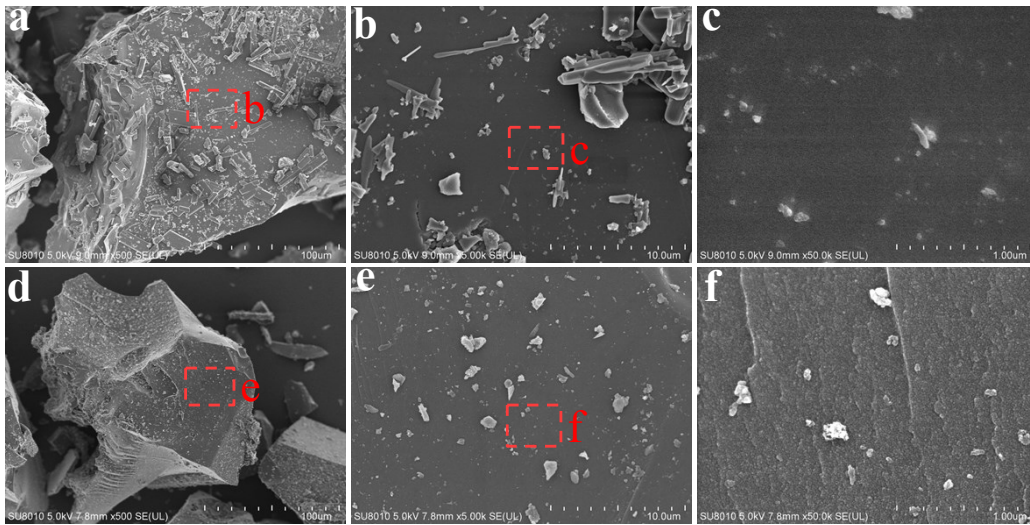

Fig. S2. Typical SEM images of the CLS-1 sample (a–c) and CLS-2 sample (d–f) prepared by OLS-1 and OLS-2, respectively: (a, b, d and e) low magnification, (c and f) high magnification.

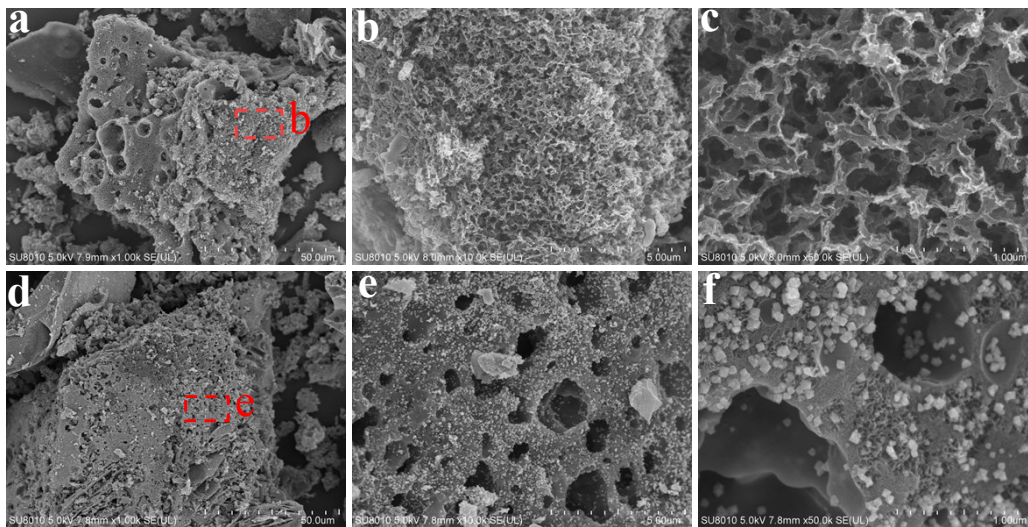

Fig. S3. Typical SEM images of the PGLS-3 sample (a–c) and PGLS-4 sample (d–f) prepared by OLS-1 and OLS-2 through the action of KOH and FeCl<sub>3</sub>, respectively: (a and d) low magnification, (b, c, e and f) high magnification.

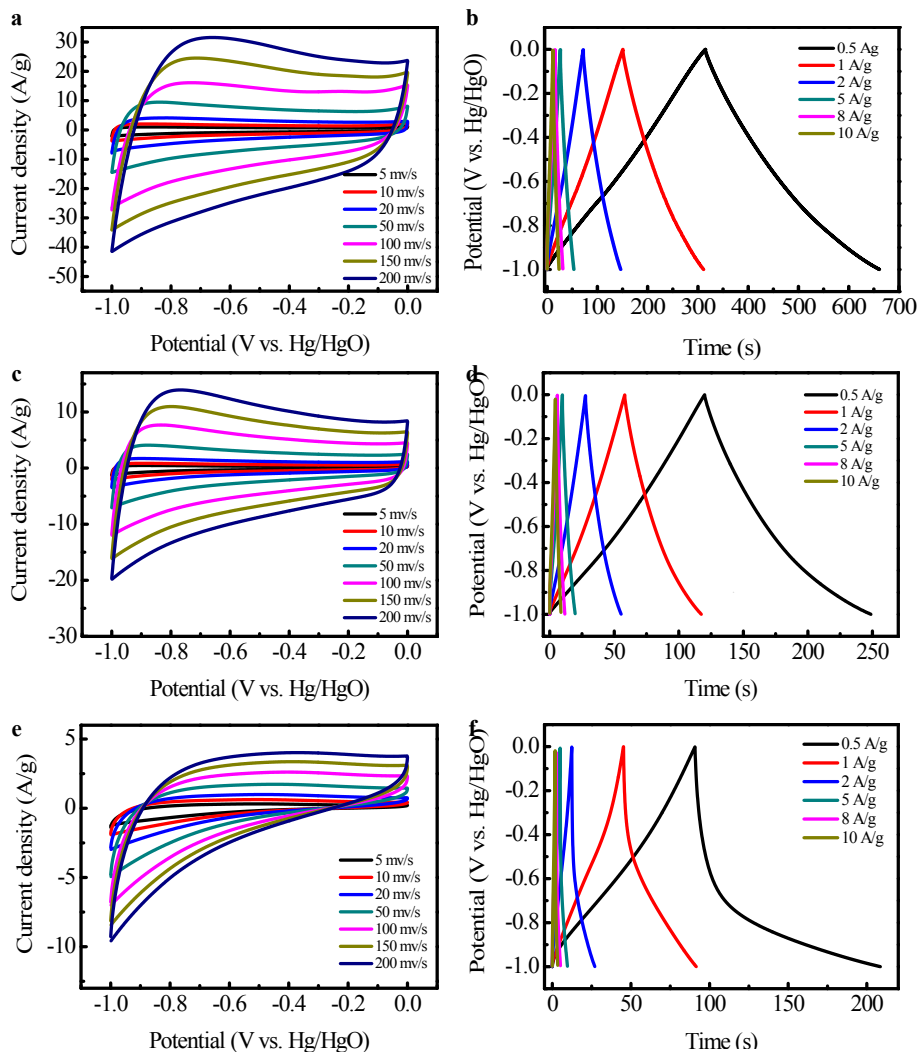

Fig. S4. Electrochemical performance of a single PGLS-1 electrode (a–b), PGLS-3 electrode (c–d) and CLS-1 electrode (e–f) measured in a three-electrode system using 6 M KOH as the electrolyte. (a) The CV profiles of the PGLS-1 electrode collected at different scan rates (from 5 to 200  $\text{mV s}^{-1}$ ) in the potential range of -1-0 V. (b) The GCD profiles of the PGLS-1 electrode recorded in the potential range of -1-0 V at different current density (from 0.5 to 10  $\text{A g}^{-1}$ ). (c) The CV profiles of the PGLS-3 electrode collected at different scan rates (from 5 to 200  $\text{mV s}^{-1}$ ) in the potential range of -1-0 V. (d) The GCD profiles of the PGLS-3 electrode recorded in the potential range of -1-0 V at different current density (from 0.5 to 10  $\text{A g}^{-1}$ ). (e) The CV profiles of the CLS-1 electrode collected at different scan rates (from 5 to 200  $\text{mV s}^{-1}$ ) in the potential range of -1-0 V. (f) The GCD profiles of the CLS-1 electrode recorded in the potential range of -1-0 V at different current density (from 0.5 to 10  $\text{A g}^{-1}$ ).

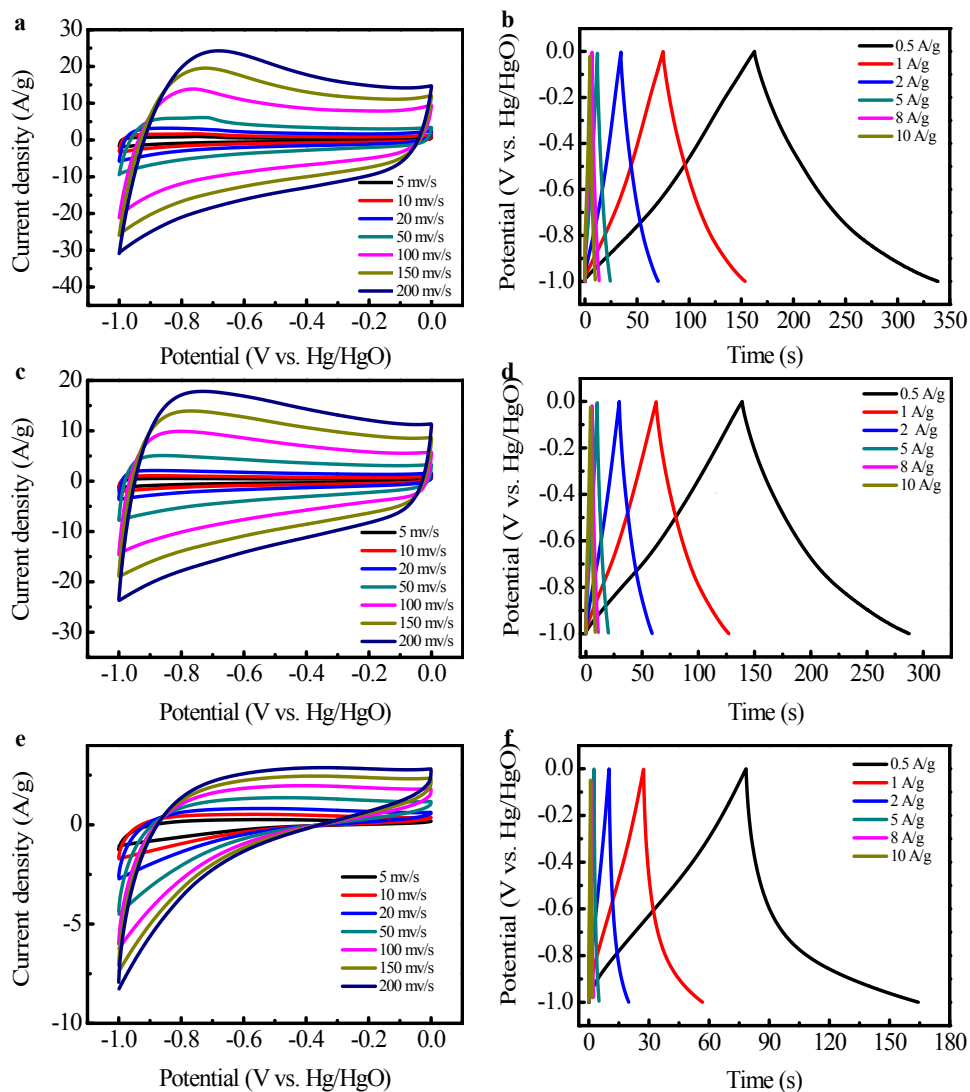

Fig. S5. Electrochemical performance of a single PGLS-2 electrode (a–b), PGLS-4 electrode (c–d) and CLS-2 electrode (e–f) measured in a three-electrode system using 6 M KOH as the electrolyte. (a) The CV profiles of the PGLS-2 electrode collected at different scan rates (from 5 to 200  $\text{mV s}^{-1}$ ) in the potential range of -1-0 V. (b) The GCD profiles of the PGLS-2 electrode recorded in the potential range of -1-0 V at different current density (from 0.5 to 10  $\text{A g}^{-1}$ ). (c) The CV profiles of the PGLS-4 electrode collected at different scan rates (from 5 to 200  $\text{mV s}^{-1}$ ) in the potential range of -1-0 V. (d) The GCD profiles of the PGLS-4 electrode recorded in the potential range of -1-0 V at different current density (from 0.5 to 10  $\text{A g}^{-1}$ ). (e) The CV profiles of the CLS-2 electrode collected at different scan rates (from 5 to 200  $\text{mV s}^{-1}$ ) in the potential range of -1-0 V. (f) The GCD profiles of the CLS-2 electrode recorded in the potential range of -1-0 V at different current density (from 0.5 to 10  $\text{A g}^{-1}$ ).

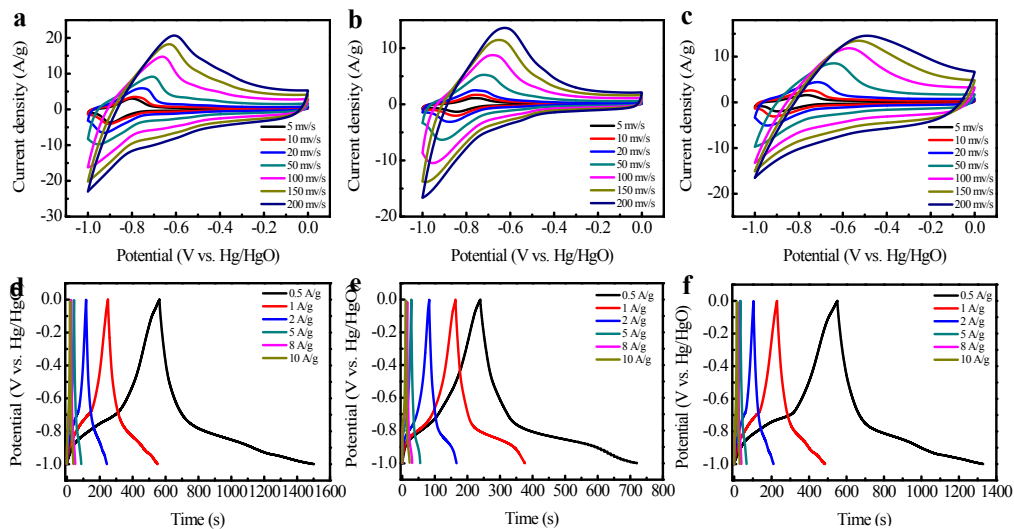

Fig. S6. Electrochemical performance of the composite electrodes with different ARS:PGLS-1 ratios measured in a three-electrode system using 6 M KOH as the electrolyte. The CV profiles of the ARS:PGLS-1=1 (a), ARS:PGLS-1=2 (b) and ARS:PGLS-1=0.5 (c) electrode, respectively, collected at different scan rates (from 5 to 200  $\text{mV s}^{-1}$ ) in the potential range of -1-0 V. The GCD profiles of the ARS:PGLS-1=1 (d), ARS:PGLS-1=2 (e) and ARS:PGLS-1=0.5 (f) electrode, respectively, recorded in the potential range of -1-0 V at different current density (from 0.5 to 10  $\text{A g}^{-1}$ ).

**Table S1.** Pore Structure Parameters of prepared samples calculated from N<sub>2</sub> adsorption isotherms

| Samples | <sup>a</sup> $S_{\text{BET}}$<br>(m <sup>2</sup> /g) | <sup>b</sup> $S_{\text{micro}}$<br>(cm <sup>3</sup> /g) | <sup>c</sup> $S_{\text{ext}}$<br>(cm <sup>3</sup> /g) | <sup>d</sup> $V_{\text{total}}$<br>(cm <sup>3</sup> /g) | <sup>e</sup> $V_{\text{micro}}$<br>(cm <sup>3</sup> /g) | <sup>f</sup> $V_{\text{meso}}$<br>(cm <sup>3</sup> /g) | <sup>g</sup> $D_{\text{aver}}$<br>(nm) |
|---------|------------------------------------------------------|---------------------------------------------------------|-------------------------------------------------------|---------------------------------------------------------|---------------------------------------------------------|--------------------------------------------------------|----------------------------------------|
| CLS-1   | 55.33                                                | 50.69                                                   | 4.64                                                  | 0.03                                                    | 0.01                                                    | 0.02                                                   | 2.35                                   |
| PGLS-3  | 581.61                                               | 459.05                                                  | 122.56                                                | 0.72                                                    | 0.41                                                    | 0.31                                                   | 4.92                                   |
| PGLS-1  | 1727.70                                              | 1326.32                                                 | 401.38                                                | 1.33                                                    | 0.73                                                    | 0.60                                                   | 3.15                                   |
| CLS-2   | 161.69                                               | 135.90                                                  | 25.79                                                 | 0.09                                                    | 0.04                                                    | 0.05                                                   | 2.30                                   |
| PGLS-4  | 596.26                                               | 445.74                                                  | 150.52                                                | 0.59                                                    | 0.30                                                    | 0.29                                                   | 3.97                                   |
| PGLS-2  | 782.74                                               | 633.80                                                  | 148.94                                                | 0.71                                                    | 0.38                                                    | 0.33                                                   | 3.63                                   |

<sup>a</sup>Specific surface area ( $S_{\text{BET}}$ ) calculated from the BET method. <sup>b</sup>Micropore specific surface area ( $S_{\text{micro}}$ ) and <sup>c</sup>specific external surface area ( $S_{\text{ext}}$ ) calculated from the N<sub>2</sub> adsorption data. <sup>d</sup>Total pore volume ( $V_{\text{total}}$ ). <sup>e</sup>Micropore volume ( $V_{\text{micro}}$ ) calculated by applying the Dubinin-Radushkevich (D-R) method. <sup>f</sup>Mesopore volume ( $V_{\text{meso}}$ ) calculated by the difference between total pore volume ( $V_{\text{total}}$ ) and micropore volume ( $V_{\text{micro}}$ ). <sup>g</sup>Average pore diameter ( $D_{\text{aver}}$ ).



| Electrode Materials                                                          | $S_{\text{BET}}$<br>( $\text{m}^2/\text{g}$ ) | Specific<br>capacitance<br>( $\text{F}/\text{g}$ ) | Electrolyte                                     | Cell<br>configuration | Ref.      |
|------------------------------------------------------------------------------|-----------------------------------------------|----------------------------------------------------|-------------------------------------------------|-----------------------|-----------|
| Porous graphitic bamboo carbon                                               | 1732.0                                        | 222.0<br>( $0.5 \text{ A g}^{-1}$ )                | 6 M KOH                                         | 3E                    | [3]       |
|                                                                              |                                               | 48.1<br>( $0.2 \text{ A g}^{-1}$ )                 | PVA-KOH                                         | 2E                    |           |
| LS-CNF-PEDOT paper                                                           | -                                             | 230<br>( $0.5 \text{ A g}^{-1}$ )                  | 0.1 M HClO <sub>4</sub><br>in                   | 3E                    | [14]      |
| Lignosulfonate derived hierarchical porous carbons                           | 903.0                                         | 247.0<br>( $0.05 \text{ A g}^{-1}$ )               | 7 M KOH                                         | 2E                    | [17]      |
| Amorphous microporous carbon                                                 | 1352.0                                        | 61.1<br>( $0.5 \text{ A g}^{-1}$ )                 | 6 M KOH                                         | 2E                    | [19]      |
| Nitrogen-containing hierarchical porous carbon spheres                       | 1255                                          | 276<br>( $0.1 \text{ A g}^{-1}$ )                  | 7 M KOH                                         | 3E                    | [27]      |
| Functional-Group modification of kraft lignin/activated carbon               | -                                             | 390<br>( $0.5 \text{ A g}^{-1}$ )                  | 1 M H <sub>2</sub> SO <sub>4</sub>              | 3E                    | [33]      |
| Cross-linked N-doped carbon nanofiber network                                | 582.0                                         | 223.8<br>( $0.5 \text{ A g}^{-1}$ )                | 1 M H <sub>2</sub> SO <sub>4</sub>              | 3E                    | [61]      |
|                                                                              |                                               | 53.8<br>( $0.25 \text{ A g}^{-1}$ )                | 1 M H <sub>2</sub> SO <sub>4</sub>              | 2E                    |           |
| Biomass based hierarchically porous hollow carbon nanospheres                | 1984.0                                        | 225<br>( $0.2 \text{ A g}^{-1}$ )                  | 6 M KOH                                         | 3E                    | [62]      |
|                                                                              |                                               | 40.0<br>( $0.5 \text{ A g}^{-1}$ )                 | 6 M KOH                                         | 2E                    |           |
| 3D nanostructure hierarchical porous graphitic carbon from pectin biopolymer | 1320.0                                        | 274.0<br>( $1 \text{ A g}^{-1}$ )                  | 6 M KOH                                         | 3E                    | [63]      |
|                                                                              |                                               | 234.0<br>( $1 \text{ A g}^{-1}$ )                  | 6 M KOH-<br>1 M Na <sub>2</sub> SO <sub>4</sub> | 2E                    |           |
| Nanoporous activated biocarbons                                              | 1968.0                                        | 223.0<br>( $0.1 \text{ A g}^{-1}$ )                | 6 M KOH                                         | 2E                    | [65]      |
|                                                                              |                                               | 351.0<br>( $0.1 \text{ A g}^{-1}$ )                | 6 M KOH                                         | 3E                    |           |
| Partially graphitized ginkgo-based activated carbon                          | 1775.0                                        | 178.0<br>( $0.4 \text{ A g}^{-1}$ )                | 6 M KOH                                         | 3E                    | [66]      |
| Lignin-derived carbon nanosheets                                             | 855.0                                         | 281.0<br>( $0.5 \text{ A g}^{-1}$ )                | 1 M H <sub>2</sub> SO <sub>4</sub>              | 3E                    | [67]      |
| Graphene hydrogel films                                                      | 414.0                                         | 186.0<br>( $1 \text{ A g}^{-1}$ )                  | H <sub>2</sub> SO <sub>4</sub> -PVA             | 2E                    | [68]      |
| ARS/PGLS-1                                                                   | 1727.7                                        | 476.5<br>( $0.5 \text{ A g}^{-1}$ )                | 6 M KOH                                         | 3E                    | This work |

**Table S2.** Specific capacitance of biomass activated carbon reported in the literature**Table S3.** Comparison of various carbonaceous electrode based supercapacitors in aqueous electrolyte system

| Electrode Materials                        | Electrolyte                        | Energy density<br>(Wh/kg) | Power density<br>(W/kg) | Ref.      |
|--------------------------------------------|------------------------------------|---------------------------|-------------------------|-----------|
| CNF-PEDOT-ARS                              | HEC/HClO <sub>4</sub> /ARS         | 2.52                      | 1805.0                  | [2]       |
| Porous graphitic bamboo carbons            | PVA/KOH                            | 6.68                      | 100.2                   | [3]       |
| Lignosulfonate derived porous carbons      | KOH                                | 7.02                      | 301.20                  | [17]      |
| Semi-graphitized microporous carbons       | KOH                                | 7.40                      | 151.40                  | [19]      |
| Nanoporous activated biocarbons            | KOH                                | 1.60                      | 10000.00                | [60]      |
| Cross-linked N-doped nanofiber network     | PVA/H <sub>3</sub> PO <sub>4</sub> | 5.60                      | 3000.00                 | [61]      |
| Biomass based hierarchically porous carbon | KOH                                | 5.60                      | 1000.00                 | [62]      |
| 3D nanostructure                           | KOH                                | 7.90                      | 494.00                  | [63]      |
| Pyrolyzed activated carbons                | Na <sub>2</sub> SO <sub>4</sub>    | 6.50                      | 500.00                  | [64]      |
| Graphene hydrogel films                    | PVA/H <sub>2</sub> SO <sub>4</sub> | 4.50                      | 5000.00                 | [68]      |
| ARS/PGLS-1                                 | PVA/KOH/ARS                        | 9.45                      | 100.06                  | This work |
